# Supplementary material for: Hierarchically mesoporous silica single-crystalline nanorods with three dimensional cubic Fm-3m mesostructure
Source: Royal Society of Chemistry journal article supplement (doi:10.1039/c3ta13025h), 2013-01-01
Supplement: c3ta13025h.pdf [file c3ta13025h.pdf]

## Supporting Information

### **Hierarchically mesoporous silica single-crystalline nanorods with three dimensional cubic *Fm-3m* mesostructure**

Chengxiang Shi, Shaoxin Deng, Jingui Wang, Pingchuan Sun and Tiehong Chen\*

Institute of New Catalytic Materials Science, Key Laboratory of Advanced Energy Materials  
Chemistry (MOE), College of Chemistry, Synergetic Innovation Center of Chemical  
Science and Engineering (Tianjin), Nankai University, Tianjin 300071, PR China.

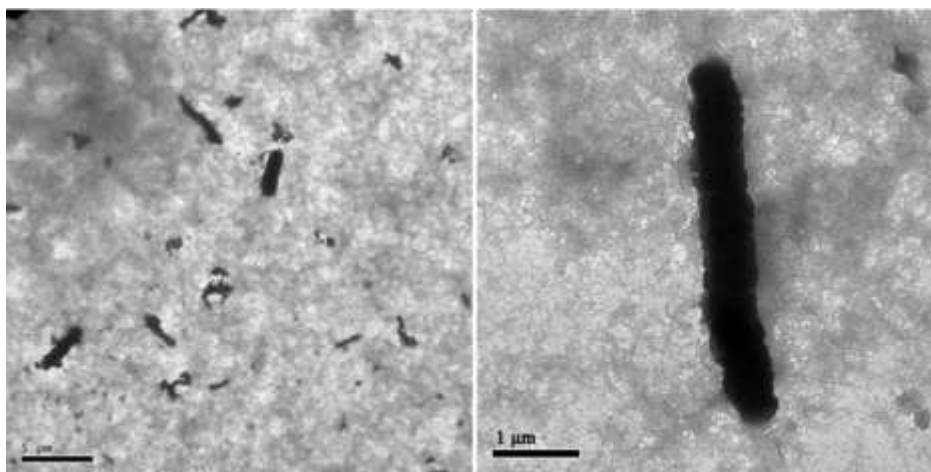

**Figure S1.** TEM images of CTA/PAA/P123 organic complex.

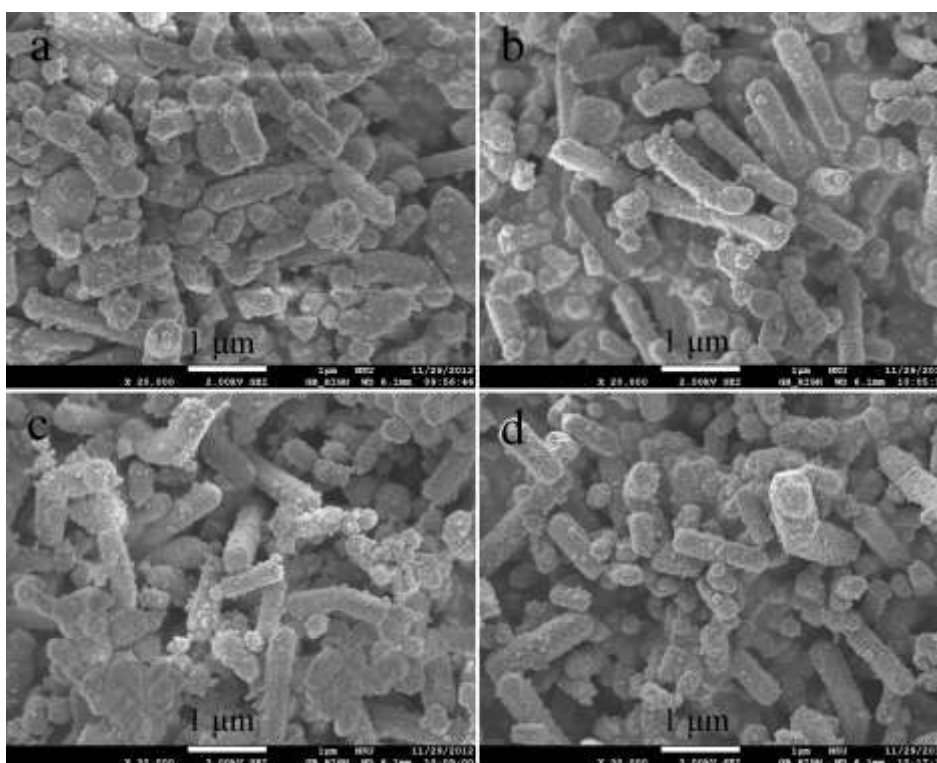

**Figure S2.** SEM images of the calcined samples synthesized at different temperatures:

(a) R.T.(~25 °C), (b) 60 °C, (c) 100 °C, (d) 120 °C.

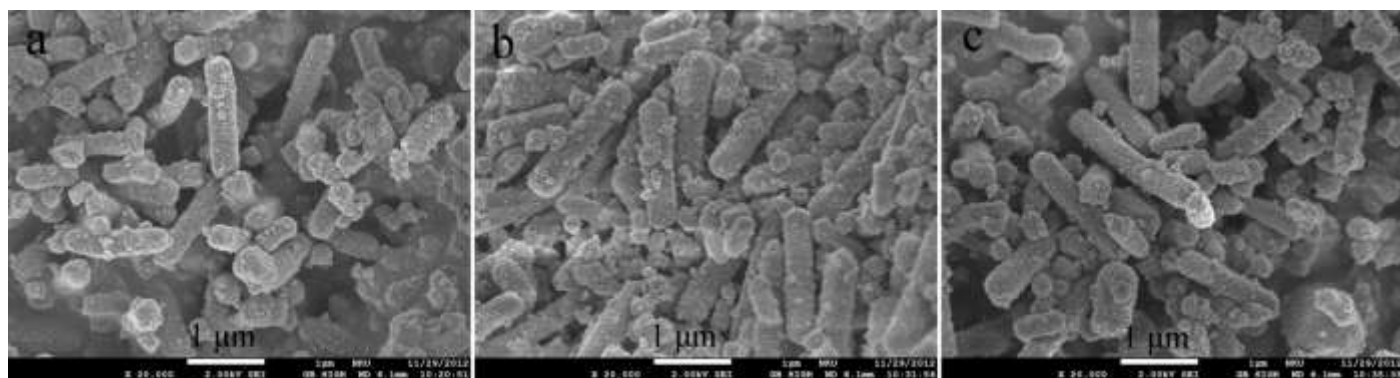

**Figure S3.** SEM images of the calcined samples prepared at 80 °C for (a) 0 h, (b) 6 h and (c) 24 h reaction time, respectively. 0 h means the sample was obtained after stirring 15 min of the reactant mixture at room temperature but without heating treatment in the 80 °C oven.

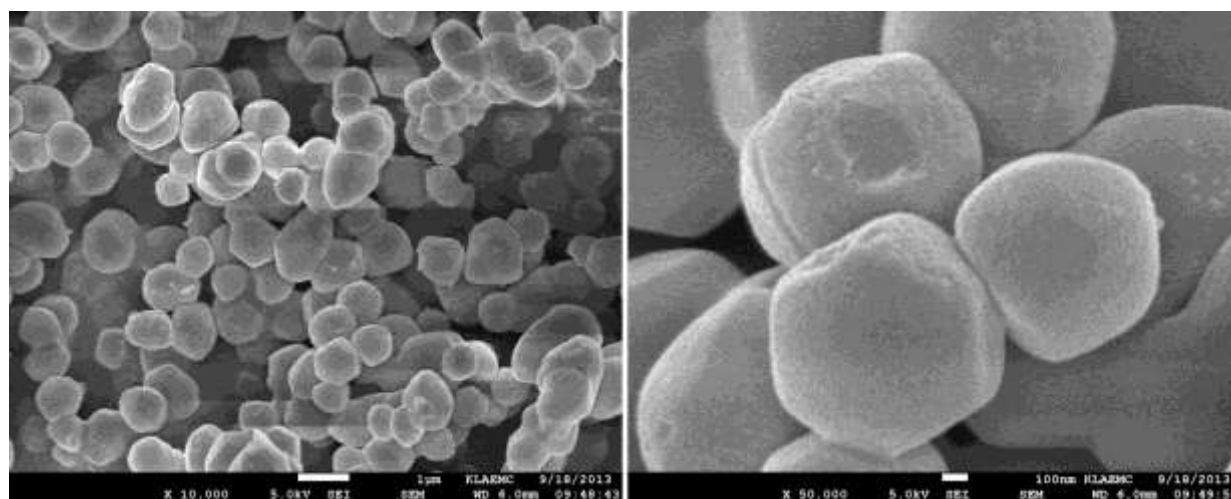

**Figure S4.** SEM images of the calcined MCM-41.

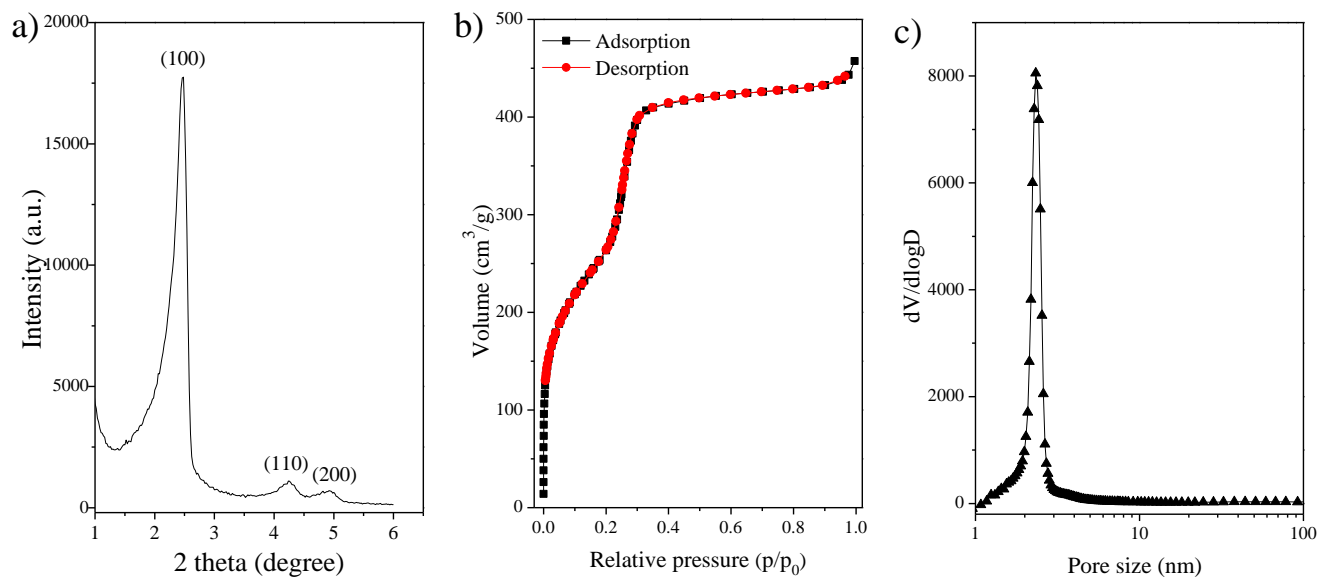

**Figure S5.** (a) XRD pattern, (b) Nitrogen adsorption-desorption isotherms and  
(c) PSD curve of the calcined MCM-41.
